# Supplementary material for: Landslide activation during deglaciation in a fjord-dominated landscape: observations from southern Alaska (1984–2022)
Source: Copernicus journal article supplement (doi:10.5194/nhess-25-2045-2025), 2025-06-24
Supplement: Supplementary file 2 [file nhess-25-2045-2025-supplement.zip]

## Supplementary Information for Videos

Manuscript title: Landslide activation during deglaciation in a fjord-dominated landscape: observations from southern Alaska (1984-2022)

Manuscript number: egusphere-2024-1086

Videos were created using Landsat 4-8 imagery courtesy of the U.S. Geological Survey.
