# Supplementary material for: Landslide activation during deglaciation in a fjord-dominated landscape: observations from southern Alaska (1984–2022)
Source: Copernicus journal article supplement (doi:10.5194/nhess-25-2045-2025), 2025-06-24
Supplement: Supplementary file 3 [file nhess-25-2045-2025-supplement.zip]

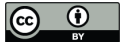

*Supplement of*

**Landslide activation during deglaciation in a fjord-dominated landscape: observations from southern Alaska (1984–2022)**

**Jane Walden et al.**

*Correspondence to:* Jane Walden ([walden@vaw.baug.ethz.ch](mailto:walden@vaw.baug.ethz.ch))

- [nhess-25-2045-2025-supplement-title-page.pdf](#)
- [supplement.pdf](#)
- [videos](#)
  - [barry.gif](#)
  - [grandpla.gif](#)
  - [tyndall.gif](#)
  - [video\\_image\\_credit.pdf](#)
  - [yale.gif](#)

The copyright of individual parts of the supplement might differ from the article licence.
